# Supplementary material for: Optimisation of azide–alkyne click reactions of polyacrylates using online monitoring and flow chemistry
Source: Royal Society of Chemistry journal article supplement (doi:10.1039/d4py00984c), 2025-01-01
Supplement: d4py00984c1.pdf [file d4py00984c1.pdf]

## Electronic Supplementary Information

### Optimisation of azide-alkyne click reactions of polyacrylates using online monitoring and flow chemistry

Despina Coursari<sup>a</sup>, Spyridon Efstathiou<sup>a</sup>, Lucas Al-Shok<sup>a</sup>, Mia D. Hall<sup>a</sup>, Ahmed M. Eissa<sup>a,b,c</sup>, Evelina Liarou<sup>a</sup>, David M. Haddleton<sup>\*a</sup>

\*Corresponding author

<sup>a</sup> Department of Chemistry, University of Warwick Gibbet Hill Road, CV4 7AL Coventry, UK.

<sup>b</sup> School of Life Sciences, Faculty of Science and Engineering, University of Wolverhampton, Wolverhampton WV1 1LY, UK.

<sup>c</sup> Department of Polymers, Chemical Industries Research Division, National Research Centre, Cairo Giza 12622, Egypt.

### Table of Contents

|                                                              |    |
|--------------------------------------------------------------|----|
| 1 Experimental Section.....                                  | 2  |
| 1.1.1 Materials .....                                        | 2  |
| 1.1.2 Instrumentation .....                                  | 2  |
| 1.1.3 Synthesis .....                                        | 3  |
| 2 Supplementary analysis and experimental data .....         | 7  |
| 2.1 Solvent effect on the reaction .....                     | 7  |
| 2.2 Effect of the ligand on the reaction rate.....           | 8  |
| 2.3 Effect of the polymer type on the rate of reaction ..... | 9  |
| 2.5 Results from in batch <sup>1</sup> H-NMR monitoring..... | 10 |
| 2.6 Flow reaction set-up.....                                | 13 |
| 3 References.....                                            | 14 |

## 1 Experimental Section

### 1.1.1 Materials

2,2'-Bipyridine (bpy ≥ 99%, Acros Organics), bathophenanthrolinedisulfonic acid disodium salt hydrate (bathophen.), *N,N,N',N'',N'''*-Pentamethyldiethylenetriamine (PMDETA ≥ 99%), triethylamine (TEA 99%), dichloromethane (DCM ≥ 99%), dimethyl sulfoxide (DMSO ≥

99%, and DMSO- $d_6$ ), dioxane, acetone, methyl ethylketone (MEK), tetrahydrofuran (THF 99.5% GC grade), propargyl alcohol (PrOH),  $\beta$ -D-Glucose pentaacetate (98%, Lancaster) were purchased from Sigma Aldrich and used as received unless otherwise stated. Methyl acrylate (MA 99%, Sigma Aldrich), butyl acrylate (BA 99%, Sigma Aldrich), benzyl acrylate (BnA 97%, Alfa Aesar) were used as received, without subsequent purification. Tris-(2-(dimethylamino)ethyl)amine ( $Me_6Tren$ ) was synthesized according to previously reported literature.<sup>1</sup> Copper(I) bromide ( $Cu(I)Br$ , 98%, Sigma-Aldrich) was washed with acetic acid and ethanol and dried under vacuum prior to use.<sup>2</sup> Azidopropanol and APBIB were synthesised according to previously reported literature.<sup>3, 4</sup>

### 1.1.2 Instrumentation

**NMR Spectroscopy.**  $^1H$  NMR spectra were recorded on a Bruker Avance 400 MHz spectrometer at 20 °C or at 50 °C, with a 90 sec acquisition time and 16 scans per spectrum. From mixing until acquisition time there was a 20 min delay causing an expected lag in the kinetic.

**Benchtop NMR.** Reactions were monitored *via*  $^1H$  NMR on a Spinsolve Magritek 80 MHz instrument. Spectra were obtained every 33 sec for a maximum period of 1 hr with acquisition time of 3.2 sec and 2 scans. For the ligand comparison spectra were taken every 71 sec for a maximum period of 10 hours with an acquisition time of 3.2 sec and 4 scans.

**Differential scanning calorimetry.** DSC measurements were performed on a Mettler Toledo DSC1-STARE system under nitrogen flow (50 mL  $min^{-1}$ ). Samples were loaded into 40  $\mu$ L aluminium pans. Methods varied depending on the sample used and  $T_g$  values were calculated from the midpoint of the thermogram from the second heating cycle unless otherwise stated.

**FT-IR Spectroscopy.** FT-IR spectroscopy measurements were carried out using a Shimadzu IR Spirit spectrometer. Spectra were recorded from 4000 to 400  $cm^{-1}$  with 8 scans performed for each sample.

**SEC analysis.**  $CHCl_3$  was used as the mobile phase on an Agilent Infinity II MDS instrument equipped with a PLgel 5  $\mu$ m guard column, 2  $\times$  PLgel Mixed C columns (300  $\times$  7.5 mm), differential refractive index (DRI), viscometry (VS), dual angle light scatter (LS) and multiple wavelength UV detectors. Samples were run at a flow rate of 1 ml/min at 30 °C. The experimental values were determined by conventional calibration (according to narrow PMMA standards in the range 550 to 1,591,000 g/mol and narrow pSt standards in the range of 160 to 364,000 g/mol) using Agilent GPC/SEC software.

**MALDI-ToF MS.** Matrix assisted laser desorption ionization time-of-flight mass spectrometry was conducted using a Bruker Daltonics Ultraflex II MALDI-ToF mass spectrometer, equipped with a nitrogen laser delivering 2 ns laser pulses at 337 nm with positive ion ToF detection performed using an accelerating voltage of 15-30 kV. Solutions in tetrahydrofuran (THF) of trans-2-[3-(4-tert-butylphenyl)-2-methyl-2-propylidene] malonitrile (DCTB) as a matrix (saturated solution), sodium iodide as the cationization agent (12 mg/mL) and sample (0.025 mg/mL) were mixed and then spotted to the target plate. Spectra were recorded in linear positive mode calibrated with PEG-monomethyl ether 1,900 kDa.

**Flow with in-line NMR.** The Vapourtec® E series Integrated Flow Chemistry System (R2+) was the platform used for the flow experiment. Flow stream was directed with 0.25 mL/min to

the reactor with PTFE tubes of 8 mL capacity at 50 °C and reaction residence time of 32 min. The reactor was connected to a Spinsolve Magritek 80 MHz instrument and the reaction was monitored with <sup>1</sup>H NMR acquired with 32 scans, a 90° pulse angle, and a 6.4 sec acquisition time.

### 1.1.3 Synthesis

#### 3-Azido-1-propanol.

In the preparation of azides care should be taken to keep the aqueous reaction or workup solutions non-acidic to avoid the generation of volatile, toxic, and explosive HN<sub>3</sub>. Unreacted NaN<sub>3</sub> in water was neutralised by oxidation with Ammonium Cerium(IV) Nitrate. Procedure was modified from literature.<sup>3</sup> Sodium azide (6.24 g, 96.0 mmol) and deionised water (60 mL) were added into a 250 mL three-neck round-bottom flask equipped with a condenser. 3-Bromo-1-propanol (4.33 mL, 47.9 mmol) was added dropwise for 10 min, and the reaction mixture was stirred at 70 °C for 24 h. The mixture was then extracted with DCM (5 x 60 mL) and the organic layer was dried over anhydrous MgSO<sub>4</sub> for 1h. A light-yellow liquid was obtained by the removal of DCM on the rotary evaporator (yield: 4.49 g, 93 %). <sup>1</sup>H NMR (400 MHz, CDCl<sub>3</sub>), δ (ppm): 3.74 (q, 2H, J = 5.8, CH<sub>2</sub>OH), 3.44 (t, 2H, J = 6.6, CH<sub>2</sub>N<sub>3</sub>), 1.91 (t, 1H, J = 5.0, CH<sub>2</sub>OH), 1.83 (m, 2H, CH<sub>2</sub>CH<sub>2</sub>OH).

#### 3-Azidopropyl 2-bromoisobutyrate (APBIB).

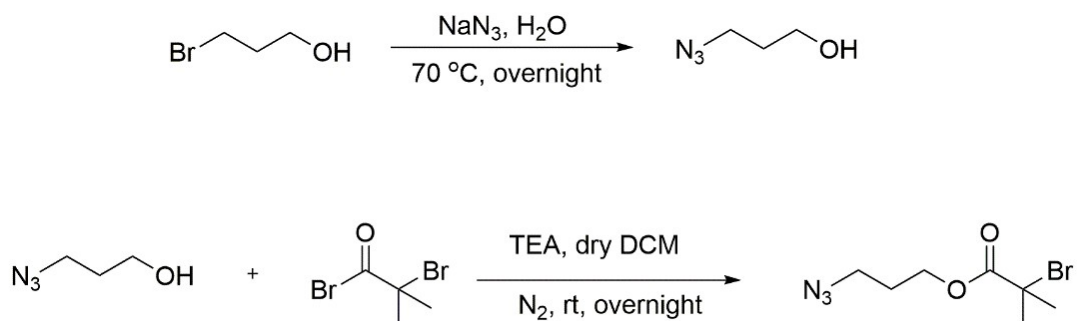

*Scheme S1. Synthesis of the azide-functionalised initiator (APBIB) in 2 steps.*

Procedure was modified from the literature.<sup>4</sup> 3-Azidopropanol (4.49 g, 43.6 mmol), TEA (7.35 mL, 52.7 mmol) and dry DCM (30mL) were added into 250 mL two-neck round-bottom flask equipped with a dropping funnel and the mixture was degassed for 20 min. 2-Bromoisobutyryl bromide (BiB) (5.86 mL, 47.4 mmol) and dry DCM (15 mL) were added into the dropping funnel. The two-neck flask was immersed into an ice-water bath and the mixture was stirred with a magnetic bar under nitrogen atmosphere. Then, over a period of 1 h the BiB solution was added dropwise into the flask. After the addition was completed, the reaction mixture was stirred further at 0 °C for 2 h and at room temperature for another 17 h. The undissolved solid formed was then filtered and the remaining solution was extracted with a saturated solution of NaHCO<sub>3</sub> (3 x 50 mL). The organic phase was then dried over anhydrous MgSO<sub>4</sub> for 1 h. DCM was removed by rotary evaporation, and the residue was further purified by column

chromatography using petroleum ether:ethyl acetate (95:5 v/v) as eluent. The solvents were removed by rotary evaporation and APBIB was obtained as a light-yellow oil (yield: 6.15 g, 56 %).  $^1\text{H}$  NMR (400 MHz,  $\text{CDCl}_3$ )  $\delta_{\text{ppm}}$ : 4.28 (t, 2H,  $J = 6.1$ ,  $\text{COOCH}_2$ ), 3.45 (t, 2H,  $J = 6.7$ ,  $\text{CH}_2\text{N}_3$ ), 1.97 (m, 2H,  $\text{CH}_2\text{CH}_2\text{N}_3$ ), 1.94 (s, 6H,  $\text{C}(\text{CH}_3)_2\text{Br}$ ).  $^{13}\text{C}$  NMR (400 MHz,  $\text{CDCl}_3$ )  $\delta_{\text{ppm}}$ : 171.42 (C=O), 62.70 ( $\text{COOCH}_2$ ), 55.69 (CBr), 47.97 ( $\text{CH}_2\text{N}_3$ ), 30.65 ( $\text{CH}_3$ ), 27.93 ( $\text{CH}_2$ ).  $\nu_{\text{max}}(\text{cm}^{-1})$ : 3287b (OH), 2971 and 2870 ( $\text{CH}_2$ ), 2094 ( $\text{N}_3$ ).

#### APBIB-pMA with targeted DP = 5.

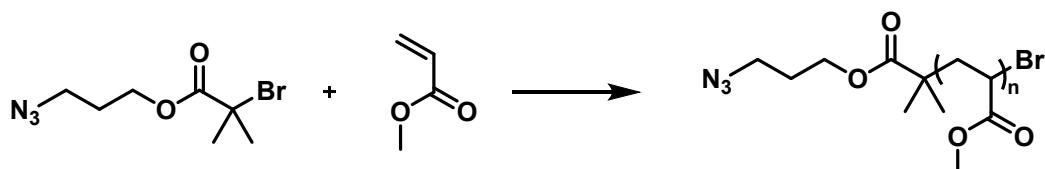

*Scheme S2. Polymerisation of MA.*

MA (1 mL, 5 eq.), APBIB (391  $\mu\text{L}$ , 1 eq.),  $\text{Cu}(\text{II})\text{Br}_2$  (24.8 mg, 0.05 eq.),  $\text{Me}_6\text{TREN}$  (107  $\mu\text{L}$ , 0.18 eq.), DMSO (2 mL) and copper wire (5 cm) wrapped around a stirring bar were added to a septum sealed vial of 8 mL and the mixture was deoxygenated by bubbling  $\text{N}_2$  for 15 min. The polymerisation was allowed to commence at ambient temperature and the conversion was determined by  $^1\text{H}$  NMR by comparison of the integration peaks from the monomer (vinyl protons, 5.75 ppm) with peaks from the backbone ( $\text{COOCH}_3$ , 3.71 and 3.61 ppm). Same procedure was followed for targeted DP = 20. The polymers were purified by precipitation in water/ methanol (120 mL, 4:1), dissolution in THF and removal of the solvent by rotary evaporation.  $M_n$  values were determined from  $\text{CHCl}_3$  SEC and  $^1\text{H}$  NMR of the purified polymer by comparison of the integration peaks of the initiator ( $\text{CH}_2\text{N}_3$ , 3.41 ppm) with peaks from the backbone ( $\text{COOCH}_3$ , 3.78 and 3.67 ppm).

#### APBIB-pBA with targeted DP = 5.

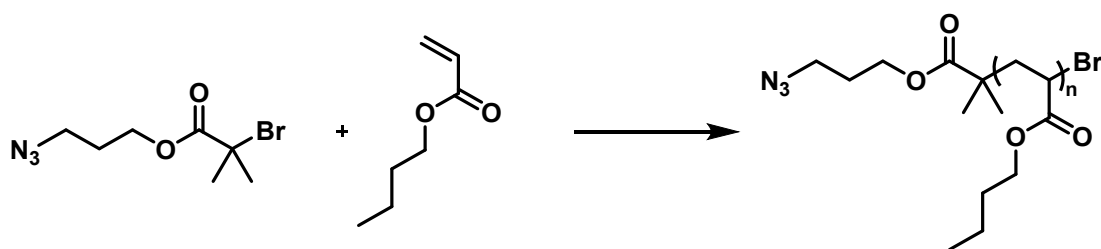

*Scheme S3. Polymerisation of BA.*

BA (1 mL, 5 eq.), APBIB (246  $\mu\text{L}$ , 1 eq.),  $\text{Cu}(\text{II})\text{Br}_2$  (15.6 mg, 0.05 eq.),  $\text{Me}_6\text{Tren}$  (67.1  $\mu\text{L}$ , 0.18 eq.), DMSO (2 mL) and copper wire (5 cm) wrapped around a stirring bar were added to a septum sealed vial of 8 mL and the mixture was deoxygenated by bubbling with  $\text{N}_2$  for 15 min. The polymerisation was allowed to commence at ambient temperature and the conversion was determined by  $^1\text{H}$  NMR by comparison of the integration peaks from the monomer (vinyl protons, 5.75 ppm) with peaks from the backbone ( $\text{CH}_2\text{CH}_3$ , 0.87 ppm). Same procedure was

followed for targeted DP = 10. The polymers were purified by precipitation in water/ methanol (120 mL, 4:1), dissolution in THF and removal of the solvent by rotary evaporation.  $M_n$  values were determined from  $\text{CHCl}_3$  SEC and  $^1\text{H}$  NMR of the purified polymer by comparison of the integration peaks of the initiator ( $\text{CH}_2\text{N}_3$ , 3.40 ppm) with peaks from the backbone ( $\text{CH}_2\text{CH}_3$ , 0.95 ppm).

#### APBIB-pBnA with targeted DP = 5.

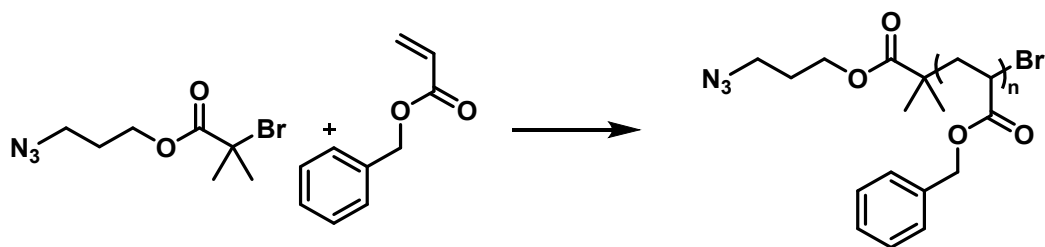

*Scheme S4. Polymerisation of BnA.*

BnA (1 mL, 5 eq.), APBIB (231  $\mu\text{L}$ , 1 eq.),  $\text{Cu(II)Br}_2$  (14.7 mg, 0.05 eq.),  $\text{Me}_6\text{Tren}$  (63.2  $\mu\text{L}$ , 0.18 eq.), DMSO (1 mL) and copper wire (5 cm) wrapped around a stirring bar were added to a septum sealed vial of 8 mL and the mixture was deoxygenated with  $\text{N}_2$  for 10 min. The polymerisation was allowed to commence at ambient temperature and the conversion was determined by  $^1\text{H}$  NMR by comparison of the integration peaks from the monomer (vinyl protons, 5.84 ppm) with peaks from the backbone ( $\text{C}_6\text{H}_5$ , 7.37 ppm). Same procedure was followed for targeted DP = 20. The polymers were purified by precipitation in methanol, dissolution in THF and removal of the solvent by rotary evaporation.  $M_n$  values were determined from  $\text{CHCl}_3$  SEC and  $^1\text{H}$  NMR of the purified polymer by comparison of the integration peaks of the initiator ( $\text{CH}_2\text{N}_3$ , 3.41 ppm) with peaks from the backbone ( $\text{C}_6\text{H}_5$ , 7.37 ppm).

#### Synthesis of alkyne sugars

##### 2-Propynyl-tetra-*O*-acetyl- $\beta$ -D-glucopyranoside (GlcAcPr).

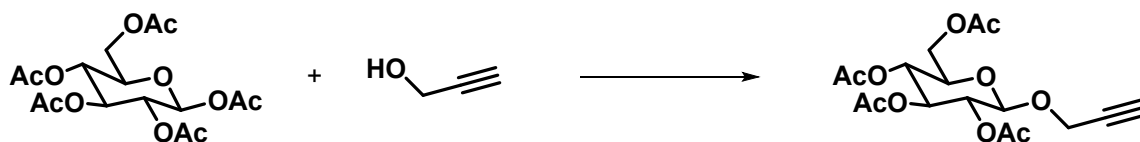

*Scheme S5. Modification reaction of  $\beta$ -D-Glucose pentaacetate.*

Procedure was adapted from the literature.<sup>5</sup>  $\beta$ -D-Glucose pentaacetate (5.0 g, 12.9 mmol) and propargyl alcohol (0.9 mL, 15.5 mmol) were dissolved in dry DCM (40 mL) and the mixture was deoxygenated by bubbling with  $\text{N}_2$  for 10 min. The mixture was placed in an ice bath and  $\text{BF}_3\text{-Et}_2\text{O}$  (2.4 mL, 19.4 mmol) was added in portions. The reaction was left to stir at ambient temperature for 2 h and was monitored *via* TLC and NMR. Upon completion, anhydrous  $\text{K}_2\text{CO}_3$  was added, the mixture was stirred further for 30 min and the salt was finally removed by filtration. The filtrate was washed with water (3 x 50 mL), the aqueous phase was separated

and extracted with DCM (2 x 30 mL) and the combined organic phases were dried over anhydrous  $\text{MgSO}_4$ . Volatiles were removed under vacuum and the brown solid obtained was recrystallised twice (DCM : Hexane = 1 : 2) to yield colourless needle-like crystals (yield: 1.60 g, 33 %).  $^1\text{H NMR}$  (400 MHz,  $\text{CDCl}_3$ )  $\delta_{\text{ppm}}$ : 5.25 (m, 1H, **H-4**), 5.10 (m, 1H, **H-3**), 5.02 (m, 1H, **H-2**), 4.78 (d, 1H,  $J = 7.9$ , **H-1**), 4.38 (d, 2H,  $J = 2.3$ ,  $\text{CH}_2\text{C}\equiv\text{CH}$ ), 4.30-4.13 (m, 2H, **H-6**), 3.74 (m, 1H, **H-5**), 2.47 (t, 1H,  $J = 2.3$ ,  $\text{CH}_2\text{C}\equiv\text{CH}$ ), 2.09, 2.06, 2.03, 2.01 (4s, 12H,  $\text{OCOCH}_3$ ). FTIR:  $\nu$  3273 ( $\text{C}\equiv\text{C}-\text{H}$ ), 2970 ( $\text{C}-\text{H}_3$ ) and  $1731\text{ cm}^{-1}$  ( $\text{C}=\text{O}$ ).

### General procedure for the ‘click’ reaction.

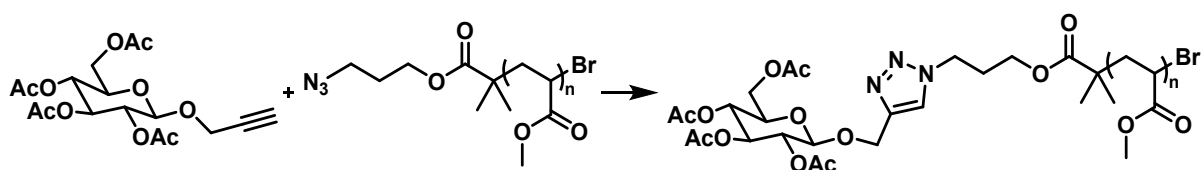

**Scheme S6.** “Click” reaction on  $N_3$ -pMA.

$\text{Cu(I)Br}$  (3.1 mg, 0.2 eq.) and  $\text{bpy}$  (6.8 mg, 0.4 eq.) were added in a septum sealed vial and purged with  $\text{N}_2$  for 2 min. Then 0.25 mL  $\text{DMSO-d}_6$  were added under stirring and the mixture was degassed for 10 min. For liquid ligands,  $\text{DMSO-d}_6$  and the ligand were first mixed in a vial and then added to the  $\text{Cu(I)Br}$ . In a separate vial, azidopropanol (10  $\mu\text{L}$ , 1 eq.) and propargyl alcohol (7.6  $\mu\text{L}$ , 1.2 eq.) were dissolved in  $\text{DMSO-d}_6$  (0.25 mL) and deoxygenated by bubbling  $\text{N}_2$  for 10 min. The polymer mixture was then transferred in a Young’s tap NMR tube previously evacuated and refilled with  $\text{N}_2$  three times. The catalyst was then added with a degassed syringe and shaken before analysis.

## 2 Supplementary analysis and experimental data

### 2.1 Solvent effect on the reaction

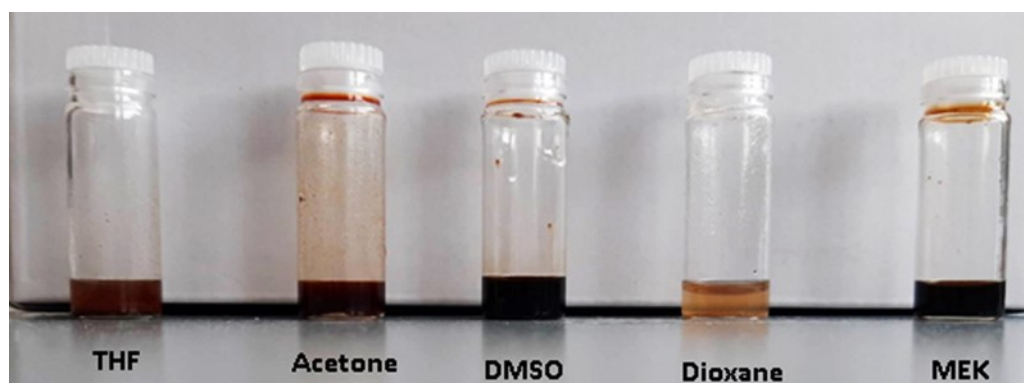

**Figure S1.**  $\text{Cu(I)Br/bpy}$  in 5 different solvents.

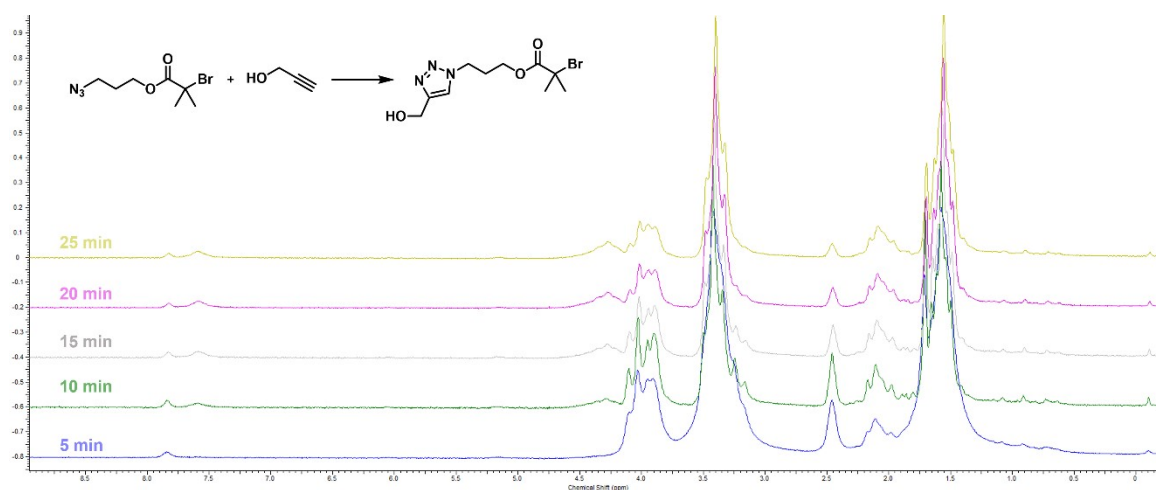

**Figure S2.** Representative example of the “click” reaction of propargyl alcohol on APBIB in THF monitored with  $^1\text{H-NMR}$  on the 80 MHz NMR. Lag time due to  $t_0 = 5$  min.

## 2.2 Effect of the ligand on the reaction rate

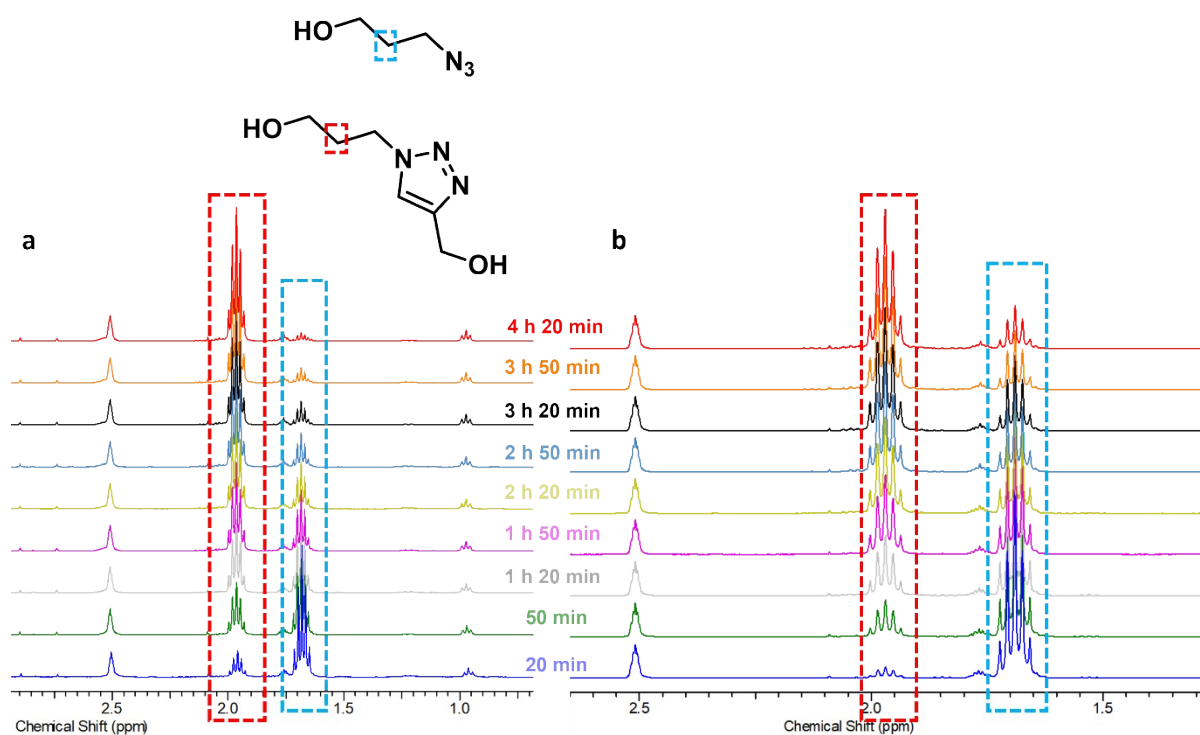

**Figure S3.**  $^1\text{H-NMR}$  spectra over a period of 4h with every spectrum taken every 30 min a. with bathophen and b. with bpy ligand in  $\text{DMSO-}d_6$ . Lag time due to  $t_0 = 20$  min.

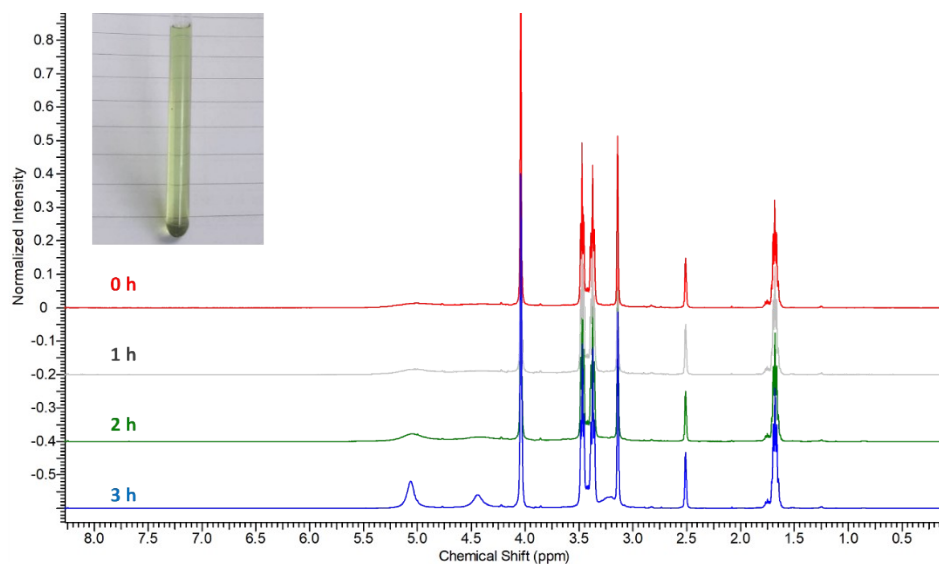

**Figure S4.**  $^1\text{H}$ -NMR over time of the reaction in  $\text{DMSO-}d_6$  at  $50\text{ }^\circ\text{C}$  with  $\text{Cu(II)Br}_2$  and *bpy* as the catalyst.

## 2.3 Effect of the polymer type on the rate of reaction

### 2.3.1 Azide initiator

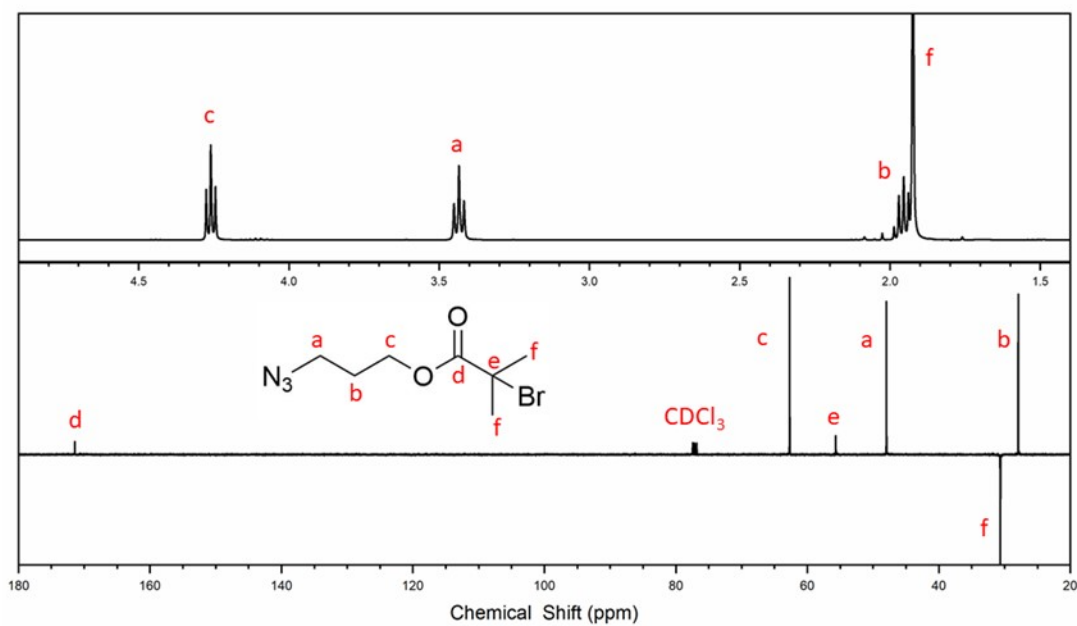

**Figure S5.**  $^1\text{H}$  and  $^{13}\text{C}$  NMR spectra (400 MHz) of APBIB recorded in  $\text{CDCl}_3$ .



### 2.3.2 FTIR of the three polymers

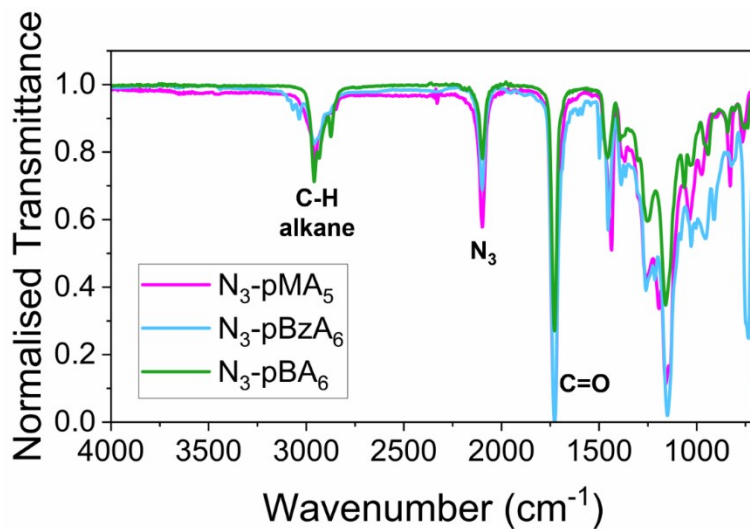

**Figure S6.** FTIR spectra of the three azide polymers,  $N_3pMA_5$ ,  $N_3pBnA_6$ ,  $N_3pBA_6$ .

### 2.3.3 DSC analysis of the polymers.

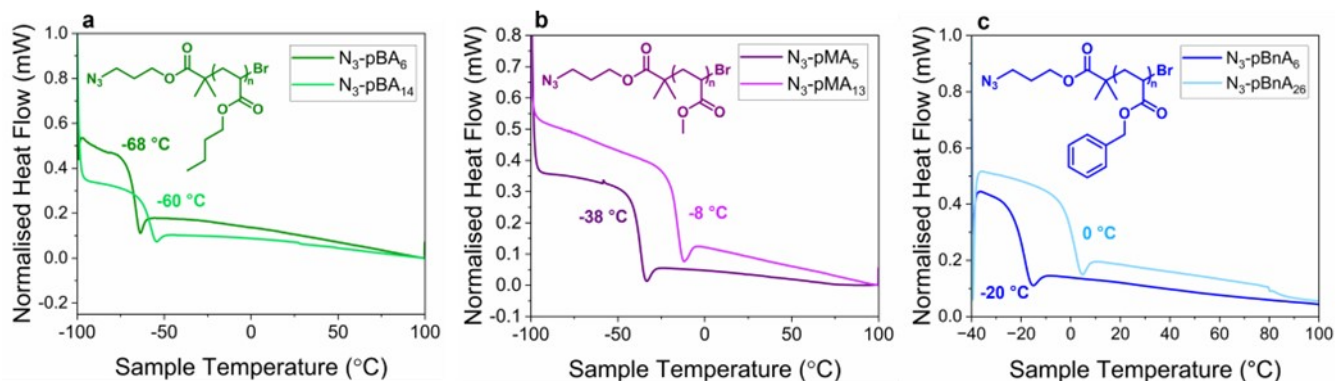

**Figure S7.** DSC and glass transitions obtained by the midpoint of the second heating cycle for a)  $N_3pBA_6$  and  $N_3pBA_{14}$ , b)  $N_3pMA_5$  and  $N_3pMA_{13}$  and c)  $N_3pBnA_6$  and  $N_3pBnA_{26}$ .

## 2.5 Results from in batch $^1\text{H-NMR}$ monitoring

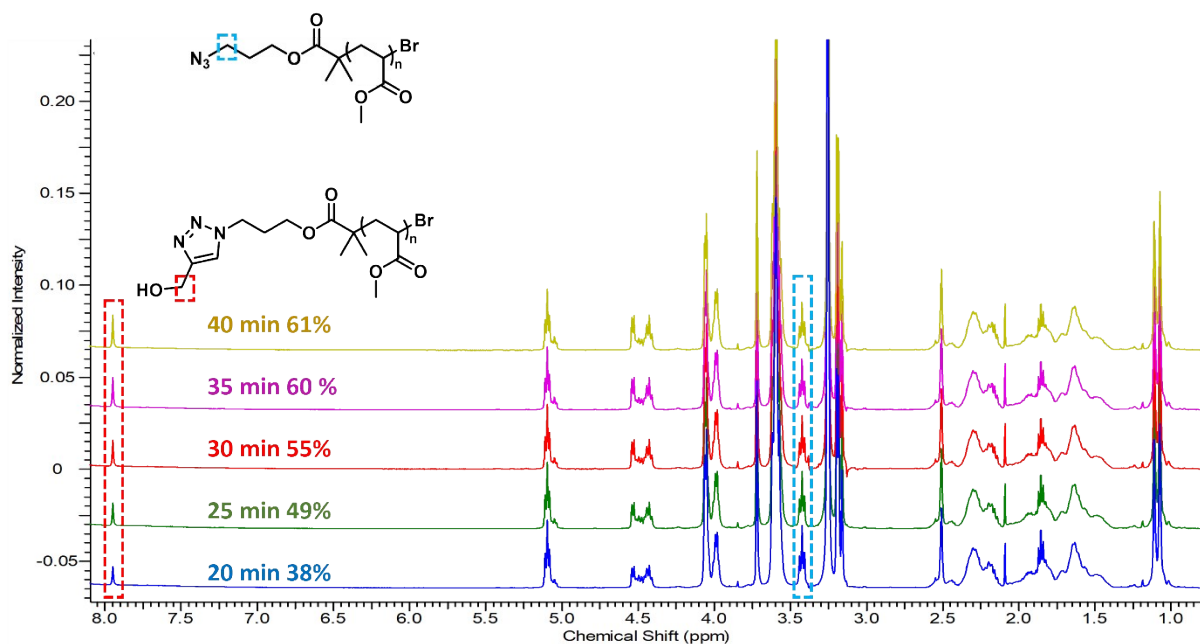

**Figure S8.**  $^1\text{H-NMR}$  spectra in  $\text{DMSO-}d_6$  at  $50\text{ }^\circ\text{C}$  for the 'click' reaction of  $\text{N}_3\text{pMA}_5$  ( $0.06\text{M}$ ) with  $\text{PrOH}$  with reaction conversions at different timepoints. Conversions were found by integrating the proton of the triazole peak and the  $\text{N}_3\text{CH}_2$  peak of the unreacted polymer. Lag time due to  $t_0 = 20\text{ min}$ .

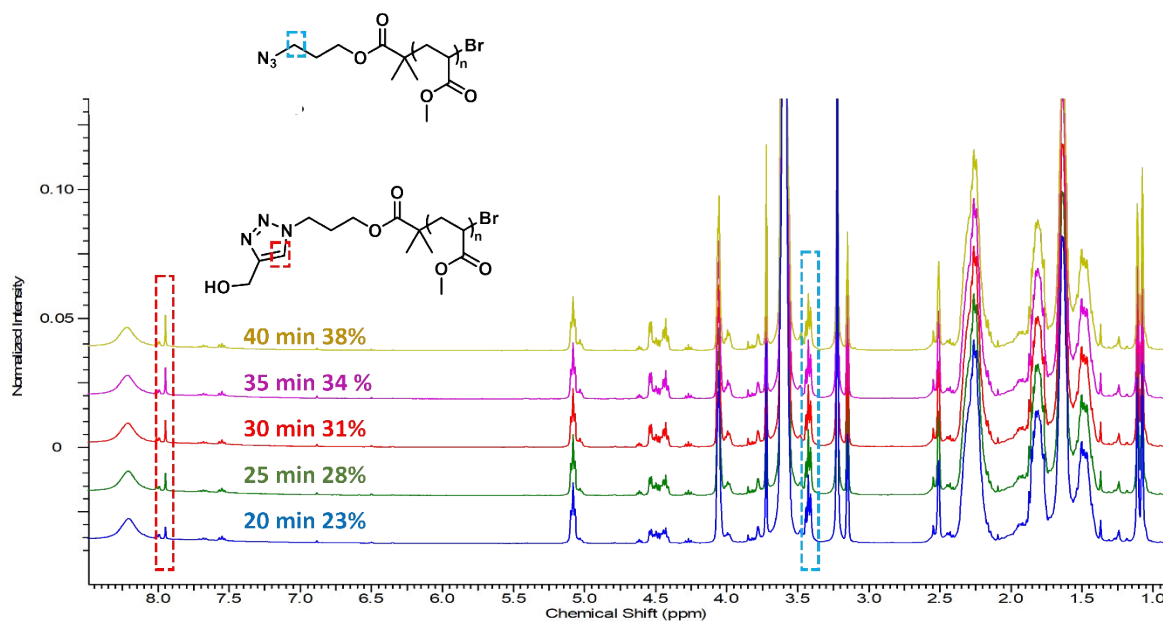

**Figure S9.**  $^1\text{H-NMR}$  spectra in  $\text{DMSO-}d_6$  at  $50\text{ }^\circ\text{C}$  for the 'click' reaction of  $\text{N}_3\text{pMA}_{20}$  ( $0.06\text{M}$ ) with  $\text{PrOH}$  with reaction conversions at different timepoints. Conversions were found by integrating the proton of the triazole peak and the  $\text{N}_3\text{CH}_2$  peak of the unreacted polymer. Lag time due to  $t_0 = 20\text{ min}$ .

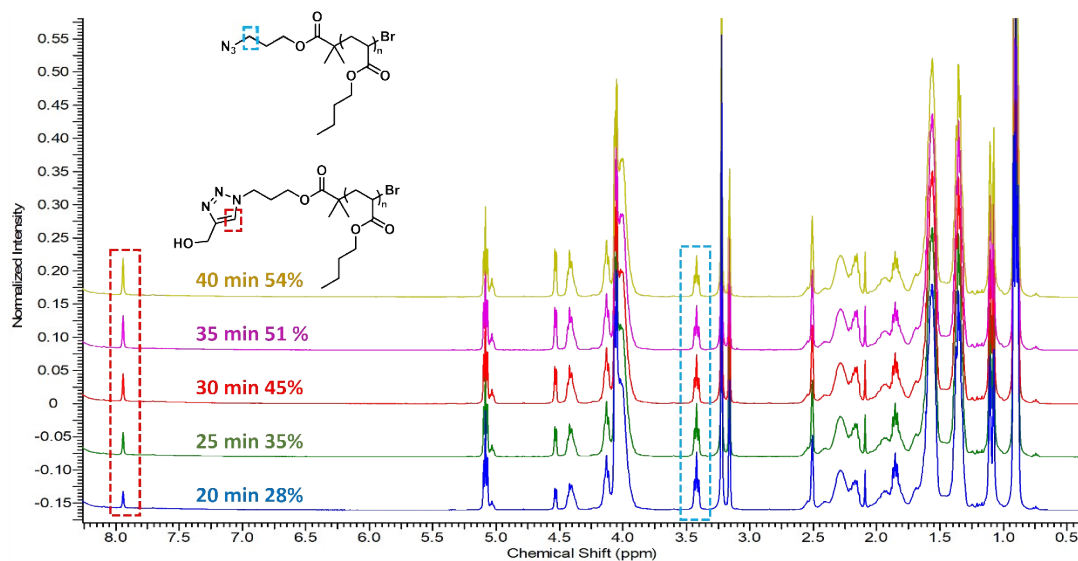

**Figure S10.**  $^1\text{H-NMR}$  spectra in  $\text{DMSO-d}_6$  at  $50\text{ }^\circ\text{C}$  for the ‘click’ reaction of  $\text{N}_3\text{pBA}_6$  ( $0.06\text{M}$ ) with  $\text{PrOH}$  with reaction conversions at different timepoints. Conversions were found by integrating the proton of the triazole peak and the  $\text{N}_3\text{CH}_2$  peak of the unreacted polymer. Lag time due to  $t_0 = 20\text{ min}$ .

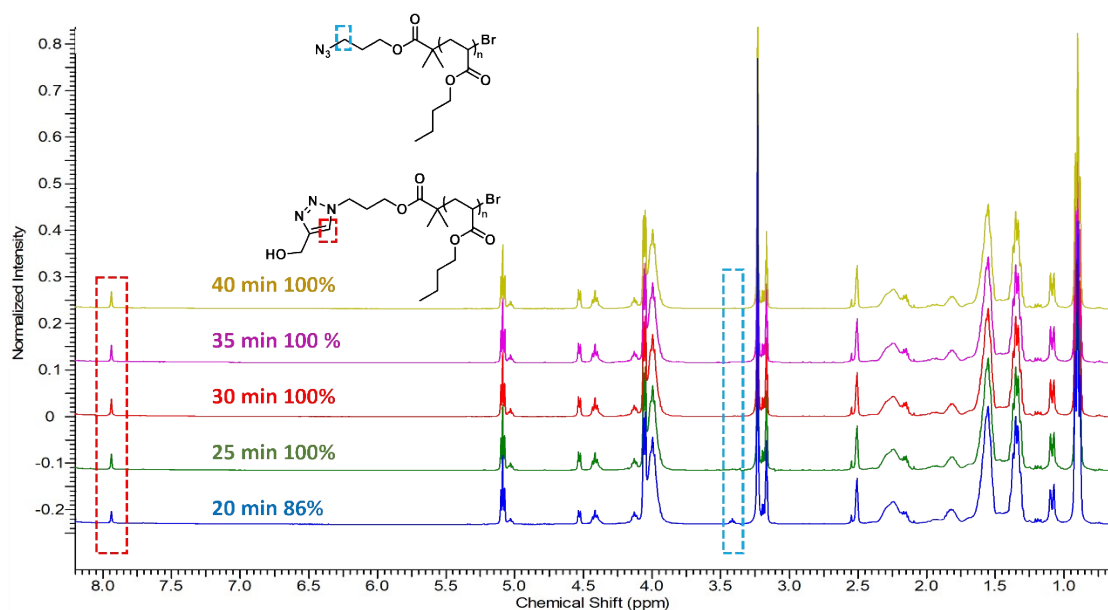

**Figure S11.**  $^1\text{H-NMR}$  spectra in  $\text{DMSO-d}_6$  at  $50\text{ }^\circ\text{C}$  for the ‘click’ reaction of  $\text{N}_3\text{pBA}_{14}$  ( $0.06\text{M}$ ) with  $\text{PrOH}$  with reaction conversions at different timepoints. Conversions were found by integrating the proton of the triazole peak and the  $\text{N}_3\text{CH}_2$  peak of the unreacted polymer. Lag time due to  $t_0 = 20\text{ min}$ .

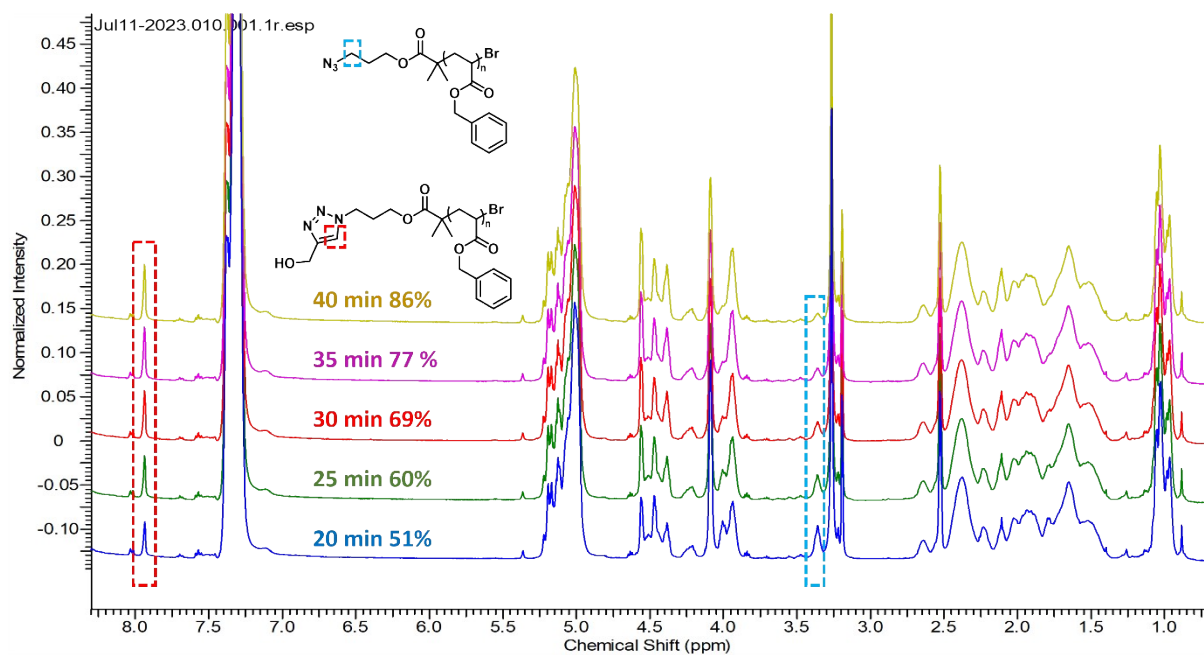

**Figure S12.**  $^1\text{H-NMR}$  spectra in  $\text{DMSO-d}_6$  at  $50\text{ }^\circ\text{C}$  for the 'click' reaction of  $\text{N}_3\text{pBnA}_6$  ( $0.06\text{M}$ ) with  $\text{PrOH}$  with reaction conversions at different timepoints. Conversions were found by integrating the proton of the triazole peak and the  $\text{N}_3\text{CH}_2$  peak of the unreacted polymer. Lag time due to  $t_0 = 20\text{ min}$ .

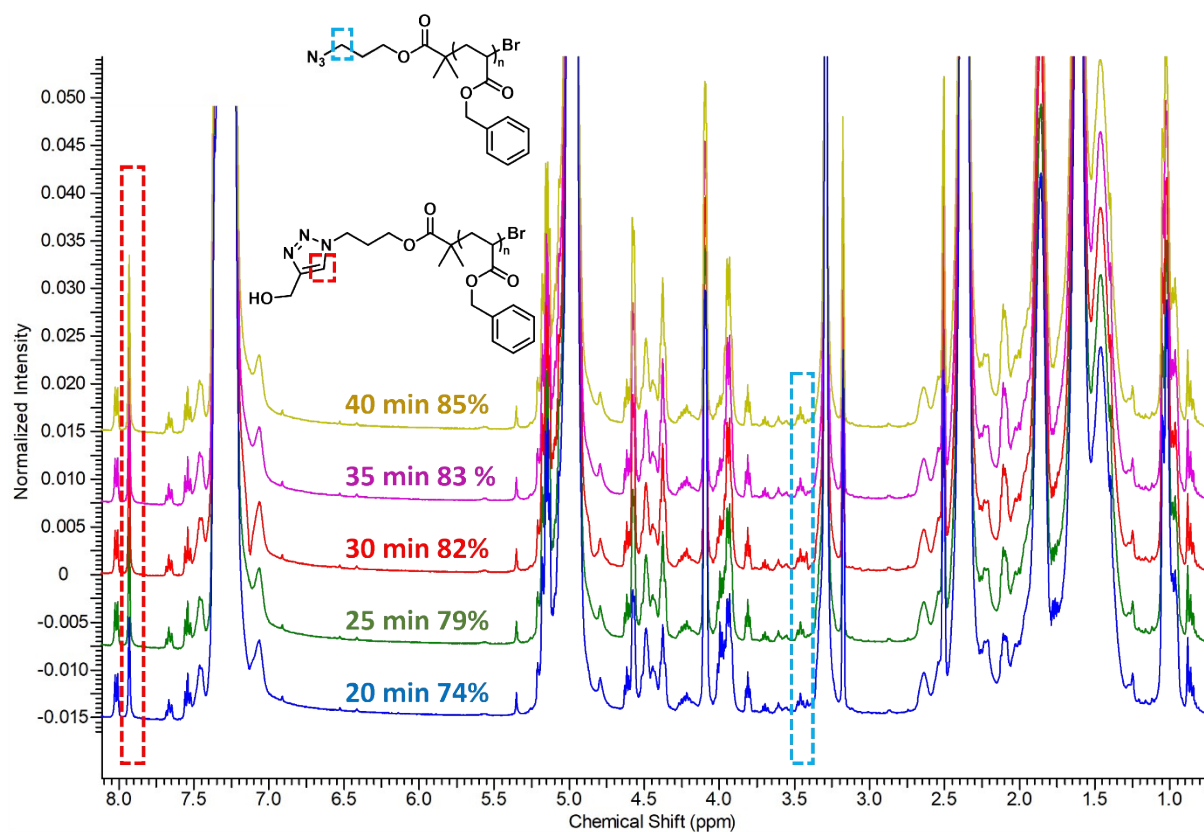

**Figure S13.**  $^1\text{H-NMR}$  spectra in  $\text{DMSO-d}_6$  at  $50\text{ }^\circ\text{C}$  for the 'click' reaction of  $\text{N}_3\text{pBnA}_{26}$  ( $0.06\text{M}$ ) with  $\text{PrOH}$  with reaction conversions at different timepoints. Conversions were found by integrating the proton of the triazole peak and the  $\text{N}_3\text{CH}_2$  peak of the unreacted polymer. Lag time due to  $t_0 = 20\text{ min}$ .

## 2.6 Flow reaction set-up

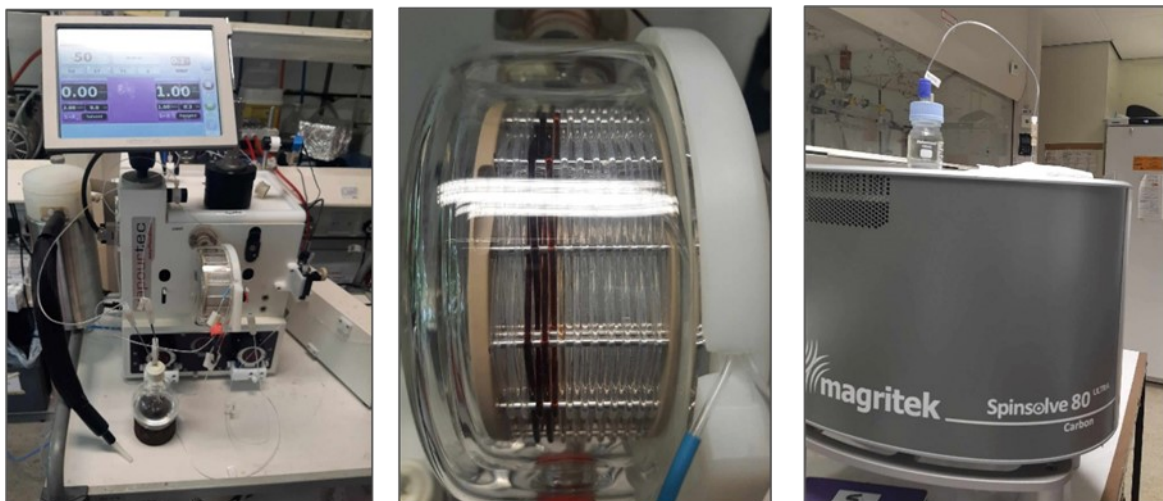

**Figure S14.** Flow reaction setup and in-line NMR 80 MHz monitoring. Flow rate 0.25 mL/min and 50 °C in the reactor. Total reactor volume was 8 mL with 32 min residence time.

## 3 References

1. M. Ciampolini and N. Nardi, *Inorg. Chem.*, 1966, **5**, 41-44.
2. R. N. Keller, H. D. Wrcoff and L. E. Marchi, *Inorg. Synth.*, 1946, 1-4.
3. A. J. Scheel, H. Komber and B. I. Voit, *Macromol. Rapid Commun.*, 2004, **25**, 1175-1180.
4. X. Wu, X. He, L. Zhong, S. Lin, D. Wang, X. Zhu and D. Yan, *J. Mater. Chem.*, 2011, **21**, 13611-13620.
5. H. B. Meryyala and S. R. Gurralla, *Carbohydr. Res.*, 1998, **307**, 351-354.
